# Supplementary material for: Colorimetric test paper for cyanide ion determination in real-time
Source: Royal Society of Chemistry journal article supplement (doi:10.1039/c5ay01033k), 2015-01-01
Supplement: c5ay01033k1.pdf [file c5ay01033k1.pdf]

## Electronic Supporting Information

### 1. Anionic Response of 2-HPEAPB in DMF, DMSO, H<sub>2</sub>O, and methanol

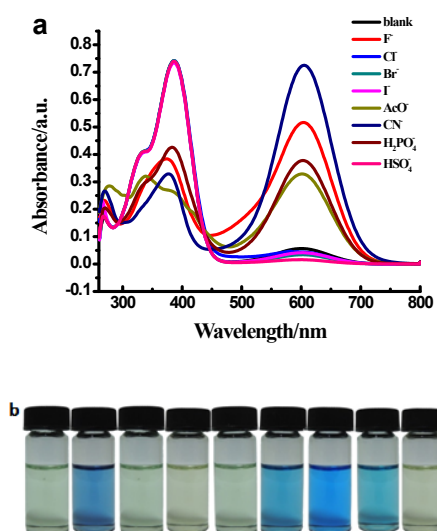

S.Fig. 1 (a) UV-Vis spectra of 2-HPEAP ( $3.0 \times 10^{-5}$  mol L<sup>-1</sup>) in DMF upon the addition of 5 equiv of F<sup>-</sup>, Cl<sup>-</sup>, Br<sup>-</sup>, I<sup>-</sup>, AcO<sup>-</sup>, CN<sup>-</sup>, H<sub>2</sub>PO<sub>4</sub><sup>-</sup>, and HSO<sub>4</sub><sup>-</sup>. (b) Color changes observed in 2-HPEAPB ( $3.0 \times 10^{-5}$  mol L<sup>-1</sup>) upon the addition of various anions as tetra-butylammonium salts ( $1.5 \times 10^{-4}$  mol L<sup>-1</sup>).

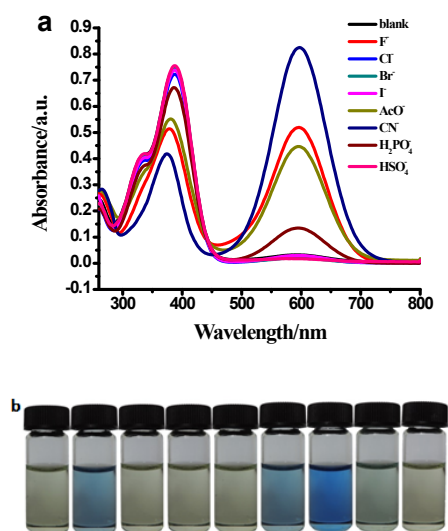

S.Fig. 2 (a) UV-Vis spectra of 2-HPEAPB ( $3.0 \times 10^{-5} \text{ mol L}^{-1}$ ) in DMSO upon the addition of 5 equiv of F<sup>-</sup>, Cl<sup>-</sup>, Br<sup>-</sup>, I<sup>-</sup>, AcO<sup>-</sup>, CN<sup>-</sup>, H<sub>2</sub>PO<sub>4</sub><sup>-</sup>, and HSO<sub>4</sub><sup>-</sup>. (b) Color changes observed in 2-HPEAPB ( $3.0 \times 10^{-5} \text{ mol L}^{-1}$ ) upon the addition of various anions as tetra-butylammonium salts ( $1.5 \times 10^{-4} \text{ mol L}^{-1}$ ).

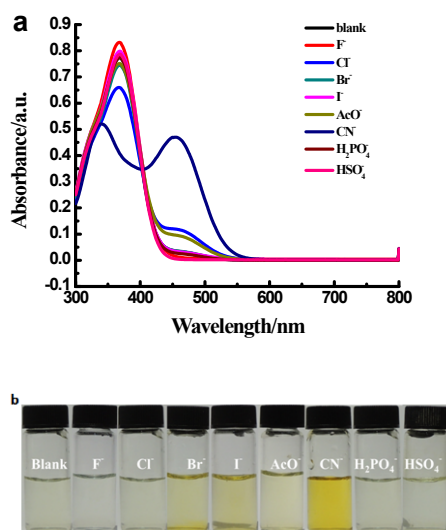

S.Fig. 3 (a) UV-Vis spectra of 2-HPEAPB ( $3.0 \times 10^{-5} \text{ mol L}^{-1}$ ) in H<sub>2</sub>O upon the addition of 5 equiv of F<sup>-</sup>, Cl<sup>-</sup>, Br<sup>-</sup>, I<sup>-</sup>, AcO<sup>-</sup>, CN<sup>-</sup>, H<sub>2</sub>PO<sub>4</sub><sup>-</sup>, and HSO<sub>4</sub><sup>-</sup>. (b) Color changes observed in 2-HPEAPB ( $3.0 \times 10^{-5} \text{ mol L}^{-1}$ ) upon the addition of various anions as tetra-butylammonium salts ( $1.5 \times 10^{-4} \text{ mol L}^{-1}$ ).

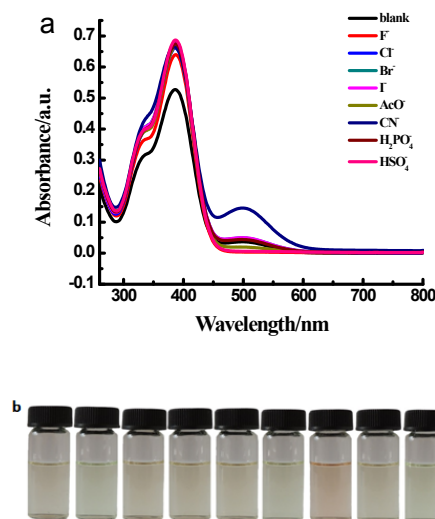

S.Fig. 4 (a) UV–Vis spectra of 2-HPEAPB ( $3.0 \times 10^{-5}$  mol L<sup>-1</sup>) in methanol upon the addition of 5 equiv of F<sup>-</sup>, Cl<sup>-</sup>, Br<sup>-</sup>, I<sup>-</sup>, AcO<sup>-</sup>, CN<sup>-</sup>, H<sub>2</sub>PO<sub>4</sub><sup>-</sup>, and HSO<sub>4</sub><sup>-</sup>. (b) Color changes observed in 2-HPEAPB ( $3.0 \times 10^{-5}$  mol L<sup>-1</sup>) upon the addition of various anions as tetra-butylammonium salts ( $1.5 \times 10^{-4}$  mol L<sup>-1</sup>).

## 2. The influence of Cations

The anti-jamming ability of 2-HPEAPB to cations including Na<sup>+</sup>, K<sup>+</sup>, Sn<sup>2+</sup>, Ba<sup>2+</sup>, Fe<sup>3+</sup>, Al<sup>3+</sup>, Ni<sup>2+</sup>, Cr<sup>3+</sup>, Co<sup>2+</sup>, Mn<sup>2+</sup>, Cd<sup>2+</sup> was evaluated using UV-Vis competition experiments (S.Fig. 5). These cations (such as K<sup>+</sup>, Na<sup>+</sup>) which cannot form complexes or precipitation with CN<sup>-</sup> produce slight influence, however, these cations (such as Sn<sup>2+</sup>, Ba<sup>2+</sup>, Fe<sup>3+</sup>, Al<sup>3+</sup>, Ni<sup>2+</sup>, Cr<sup>3+</sup>, Co<sup>2+</sup>, Mn<sup>2+</sup>, and Cd<sup>2+</sup>) which could form precipitation or complexes with CN<sup>-</sup> produce great influence.

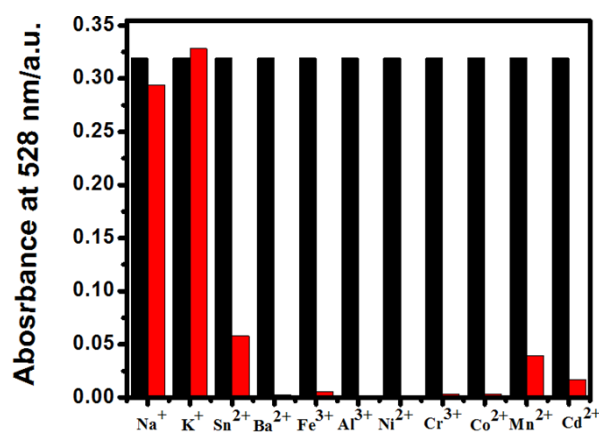

S.Fig. 5 The UV-Vis intensity of 2-HPEAPB ( $3.0 \times 10^{-5}$  mol L<sup>-1</sup>) in acetonitrile-water (95:5, v/v) at 528 nm to various metal ions. The black bars represent the UV-Vis intensity of 2-HPEAPB in the presence of 1 equiv of CN<sup>-</sup>. The red bars represent the UV-Vis intensity of 2-HPEAPB in the presence of 1 equiv upon subsequent addition of 1 equiv various cations (Na<sup>+</sup>, K<sup>+</sup>, Sn<sup>2+</sup>, Ba<sup>2+</sup>, Fe<sup>3+</sup>, Al<sup>3+</sup>, Ni<sup>2+</sup>, Cr<sup>3+</sup>, Co<sup>2+</sup>, Mn<sup>2+</sup>, Cd<sup>2+</sup>).
